# Supplementary material for: Factors affecting genotyping success in giant panda fecal samples
Source: PeerJ. 2017 May 23;5:e3358. doi: 10.7717/peerj.3358 (PMC5444362; doi:10.7717/peerj.3358)
Supplement: Data S1 [file peerj-05-3358-s006.xlsx]

## Sheet: 1 month
Genotype of giant panda
		Gp4		Aime10		Aime16		Panda22		Panda25		Panda29		Gpz6		Gpl29		Gpl60
blood sample	bwl01	139	147	214	222	254	254	202	205	143	146	169	169	225	225	181	193	237	245
	bwl02	147	147	210	226	254	260	208	211	143	143	166	169	225	225	181	193	237	245
	bwl03	139	139	226	226	260	266	205	205	146	146	163	166	225	225	193	193	241	241
	bwl04	139	147	226	226	260	264	211	211	146	146	166	169	225	225	193	193	237	245
	bwl05	147	147	226	226	254	254	205	211	137	143	163	166	225	229	181	189	237	241
	bwl06	139	147	226	230	254	268	208	211	146	146	166	169	225	225	189	193	237	245
	bwl07	147	147	226	230	254	260	202	208	137	146	166	166	229	229	181	189	241	245
	bwl08	147	147	226	230	254	266	208	208	143	143	166	166	225	229	189	193	245	245
	bwl09	139	139	226	234	254	260	208	211	146	146	166	169	229	229	189	193	237	245
	bwl10	139	141	226	234	254	254	208	211	146	146	166	169	225	225	189	193	241	245
	bwl11	139	141	230	234	254	254	205	211	143	146	166	166	225	225	185	193	237	245
	bwl12	139	147	234	238	254	254	208	211	143	146	166	169	225	225	181	185	237	241
	bwl13	141	147	222	238	260	270	208	214	143	146	163	169	217	225	189	193	241	249
	bwl14	141	141	214	230	254	254	205	205	146	146	169	169	229	229	185	185	245	249
	bwl15	139	147	226	230	254	260	208	208	137	143	166	166	225	225	181	189	237	241
	bwl16	139	147	230	234	254	262	205	208	143	146	163	169	213	225	181	189	237	245
	bwl17	139	139	226	230	254	266	208	211	143	146	166	169	225	225	189	193	237	245
EtoH-Preserved fecal samples	feaWL01	139	147	214	222	254	254	202	205	143	146	169	169	225	225	181	193	237	245
	feaWL02	147	147	210	226	254	260	208	211	143	143	166	169	225	225	181	193	237	245
	feaWL03	-1	-1	-1	-1	-1	-1	205	205	-1	-1	-1	-1	-1	-1	-1	-1	-1	-1
	feaWL04	139	147	224	226	260	260	211	211	146	146	166	169	225	225	193	193	237	245
	feaWL05	147	147	224	226	254	254	208	211	137	143	163	166	225	229	181	189	237	241
	feaWL06	-1	-1	216	230	254	268	-1	-1	146	146	166	169	225	225	189	193	237	245
	feaWL07	139	139	226	230	254	260	208	208	137	146	166	166	229	229	181	189	241	245
	feaWL08	147	147	226	230	254	264	208	208	143	143	166	166	225	229	189	193	245	245
	feaWL09	139	139	226	234	254	260	208	211	146	146	166	169	229	229	189	193	237	245
	feaWL10	139	141	226	234	254	254	-1	-1	146	146	166	169	225	225	189	193	241	245
	feaWL11	139	141	230	234	254	254	205	211	143	146	166	166	225	225	185	193	237	245
	feaWL12	139	139	234	238	254	254	208	211	143	146	166	169	225	225	181	185	237	241
	feaWL13	145	145	224	238	262	270	208	214	143	146	163	169	-1	-1	189	193	241	249
	feaWL14	141	141	214	230	252	252	205	205	146	146	169	169	229	229	185	185	245	249
	feaWL15	139	147	226	230	254	260	208	208	137	143	166	166	225	225	181	189	237	241
	feaWL16	145	145	-1	-1	254	262	205	208	143	146	163	169	213	225	181	189	237	245
	feaWL17	139	139	-1	-1	254	264	208	211	143	146	166	169	225	225	189	193	237	245
EtoH/-20℃	febWL01	139	147	214	222	254	254	202	205	143	146	169	169	225	225	181	193	237	245
	febWL02	-1	-1	-1	-1	254	254	-1	-1	143	143	-1	-1	225	225	181	193	237	237
	febWL03	-1	-1	-1	-1	-1	-1	-1	-1	-1	-1	-1	-1	-1	-1	-1	-1	-1	-1
	febWL04	139	147	224	226	260	260	211	211	146	146	166	169	225	225	193	193	237	245
	febWL05	147	147	224	226	254	254	-1	-1	137	143	163	166	225	229	181	189	237	241
	febWL06	139	147	224	226	254	268	208	202	146	146	166	169	225	225	189	193	237	245
	febWL07	139	139	226	230	254	260	202	208	137	146	166	166	229	229	181	189	241	245
	febWL08	147	147	226	226	254	264	208	208	143	143	166	166	225	229	189	193	245	245
	febWL09	139	139	226	234	254	260	208	211	146	146	-1	-1	229	229	189	193	237	245
	febWL10	139	139	226	234	254	254	208	211	146	146	-1	-1	225	225	189	193	241	245
	febWL11	139	141	230	234	254	254	205	211	143	146	-1	-1	225	225	-1	-1	-1	-1
	febWL12	145	145	224	238	-1	-1	208	211	143	146	166	169	225	225	181	185	237	241
	febWL13	141	145	214	224	262	270	208	214	143	146	163	169	217	225	189	193	241	249
	febWL14	-1	-1	230	230	270	270	205	205	-1	-1	-1	-1	229	229	185	185	245	249
	febWL15	-1	-1	230	230	254	260	208	208	137	143	166	166	225	225	181	189	237	241
	febWL16	139	145	230	226	254	262	205	208	146	146	163	169	213	225	181	189	237	245
	febWL17	139	139	-1	-1	254	264	208	211	143	146	166	169	225	225	189	193	237	245
2 steps-preserved fecal samples	fecWL01	139	147	214	222	254	254	202	205	143	146	169	169	225	225	181	193	237	245
	fecWL02	147	147	210	226	254	260	208	211	143	143	-1	-1	225	225	181	193	237	245
	fecWL03	-1	-1	216	230	-1	-1	205	205	-1	-1	-1	-1	-1	-1	-1	-1	-1	-1
	fecWL04	139	147	224	226	260	260	211	211	146	146	166	169	225	225	193	193	237	245
	fecWL05	147	147	224	226	254	254	208	211	137	143	-1	-1	225	229	181	189	237	241
	fecWL06	147	147	216	230	254	268	208	202	-1	-1	-1	-1	225	225	189	193	237	245
	fecWL07	139	139	226	230	254	260	202	208	137	146	166	166	229	229	181	189	241	245
	fecWL08	147	147	226	230	254	264	208	208	143	143	166	166	225	229	189	193	245	245
	fecWL09	139	139	226	234	254	260	208	211	146	146	-1	-1	229	229	189	193	237	245
	fecWL10	139	139	226	234	254	254	208	211	146	146	166	169	225	225	189	193	241	245
	fecWL11	139	139	230	234	254	254	205	211	143	146	166	166	225	225	185	193	237	245
	fecWL12	139	147	238	238	254	254	208	211	143	146	166	169	225	225	181	185	237	241
	fecWL13	139	147	224	238	262	270	-1	-1	143	146	-1	-1	217	225	189	193	241	249
	fecWL14	139	139	214	230	254	254	205	205	146	146	-1	-1	229	229	185	185	245	249
	fecWL15	139	147	226	230	254	260	208	208	137	143	166	166	225	225	181	189	237	241
	fecWL16	139	147	230	234	254	262	205	208	143	146	-1	-1	213	225	181	189	237	245
	fecWL17	147	147	226	230	254	264	208	211	-1	-1	-1	-1	225	225	189	193	237	245
DET-preseved fecal samples	fedWL01	139	147	-1	-1	254	254	202	205	143	143	-1	-1	225	225	181	193	245	245
	fedWL02	147	147	210	226	254	260	208	211	143	143	166	169	225	225	181	193	237	245
	fedWL03	-1	-1	-1	-1	260	260	205	205	146	146	-1	-1	-1	-1	-1	-1	-1	-1
	fedWL04	139	147	224	226	254	254	211	211	146	146	-1	-1	225	225	193	193	237	245
	fedWL05	147	147	-1	-1	254	254	208	211	137	143	163	166	225	229	181	189	237	241
	fedWL06	139	147	226	230	254	268	208	202	-1	-1	-1	-1	225	225	189	193	237	245
	fedWL07	139	139	226	230	254	260	202	208	137	146	-1	-1	229	229	181	189	241	245
	fedWL08	147	147	226	226	254	264	208	208	143	143	-1	-1	225	229	189	193	245	245
	fedWL09	139	139	226	234	254	260	208	211	-1	-1	-1	-1	229	229	189	193	237	245
	fedWL10	139	139	226	234	254	254	208	211	146	146	-1	-1	225	225	189	193	241	245
	fedWL11	139	139	230	234	254	254	205	211	-1	-1	166	166	225	225	185	193	237	245
	fedWL12	139	147	-1	-1	254	254	208	211	143	146	166	169	225	225	181	185	237	241
	fedWL13	139	147	224	238	262	270	208	214	143	146	163	169	217	225	189	193	241	249
	fedWL14	139	139	214	230	254	254	208	208	146	146	169	169	229	229	185	185	245	249
	fedWL15	139	147	226	230	254	260	208	208	137	137	-1	-1	225	225	181	189	237	241
	fedWL16	139	147	230	234	254	262	205	208	143	146	163	169	213	225	181	189	237	245
	fedWL17	147	147	226	230	254	264	208	211	146	146	166	169	-1	-1	-1	-1	-1	-1
-20℃-preserved fecal samples	feeWL01	139	147	214	222	254	254	202	205	143	146	-1	-1	225	225	181	193	237	245
	feeWL02	147	147	210	226	254	260	208	211	143	143	-1	-1	225	225	181	193	237	245
	feeWL03	-1	-1	-1	-1	260	260	205	205	146	146	-1	-1	-1	-1	-1	-1	-1	-1
	feeWL04	139	147	-1	-1	260	260	211	211	146	146	-1	-1	225	225	193	193	237	245
	feeWL05	147	147	224	226	254	254	208	211	137	143	163	166	225	229	181	189	237	241
	feeWL06	139	147	230	230	254	268	208	202	146	146	166	169	225	225	189	193	237	245
	feeWL07	139	139	226	230	254	260	202	208	137	146	166	166	229	229	181	189	241	245
	feeWL08	147	147	226	226	254	264	208	208	143	143	166	166	225	229	189	193	245	245
	feeWL09	139	139	226	234	254	260	208	211	146	146	166	169	229	229	189	193	237	245
	feeWL10	139	139	226	234	254	254	208	211	146	146	166	169	225	225	189	193	241	245
	feeWL11	139	139	230	234	254	254	205	211	143	146	-1	-1	225	225	185	193	237	245
	feeWL12	139	147	234	238	254	254	208	211	143	146	166	169	225	225	181	185	237	241
	feeWL13	139	147	-1	-1	-1	-1	211	211	-1	-1	-1	-1	-1	-1	-1	-1	-1	-1
	feeWL14	139	139	214	230	254	254	205	205	146	146	169	169	229	229	185	185	245	249
	feeWL15	139	147	226	230	254	260	208	208	137	143	166	166	225	225	181	189	237	241
	feeWL16	139	147	230	234	254	262	205	208	143	146	163	169	213	225	181	189	237	245
	feeWL17	147	147	226	230	254	264	211	211	143	146	-1	-1	225	225	189	193	237	245

## Sheet: 3 months
Genotype of giant panda
		Gp4		Aime10		Aime16		Panda22		Panda25		Panda29		Gpz6		Gpl29		Gpl60
EtoH-Preserved fecal samples	feaWL01	139	147	214	222	254	254	202	205	143	146	169	169	225	225	181	193	237	245
	feaWL02	147	147	210	226	254	260	208	211	143	143	166	169	225	225	181	193	237	245
	feaWL03	139	139	-1	-1	-1	-1	-1	-1	-1	-1	-1	-1	-1	-1	-1	-1	241	241
	feaWL04	139	139	-1	-1	-1	-1	211	211	146	146	-1	-1	225	225	193	193	237	245
	feaWL05	147	147	224	226	254	254	205	211	137	143	163	166	225	229	181	189	237	241
	feaWL06	139	147	226	230	254	268	208	211	143	143	166	169	-1	-1	-1	-1	-1	-1
	feaWL07	139	139	226	230	254	260	202	208	137	146	166	166	225	229	181	189	241	245
	feaWL08	147	147	226	230	254	266	208	208	143	143	166	166	225	229	189	193	245	245
	feaWL09	139	139	226	234	254	260	208	211	146	146	166	169	225	225	189	193	237	245
	feaWL10	139	141	226	234	254	254	208	211	146	146	166	169	225	225	189	193	241	245
	feaWL11	139	141	230	234	254	254	205	211	143	146	166	166	225	225	185	193	237	245
	feaWL12	139	147	234	238	254	254	208	211	143	146	166	169	225	225	181	185	237	241
	feaWL13	139	147	224	236	262	270	208	214	143	146	163	169	-1	-1	189	193	-1	-1
	feaWL14	139	139	-1	-1	254	254	205	205	146	146	-1	-1	-1	-1	-1	-1	-1	-1
	feaWL15	139	147	226	230	254	260	208	208	-1	-1	166	166	225	225	181	189	237	241
	feaWL16	139	147	230	234	254	262	205	208	-1	-1	163	169	213	225	181	189	237	245
	feaWL17	139	139	226	230	254	264	208	211	143	146	166	169	225	225	189	193	237	245
EtoH/-20℃	febWL01	139	147	214	222	254	254	202	205	143	146	169	169	225	225	181	193	237	245
	febWL02	147	147	210	226	254	260	208	211	-1	-1	-1	-1	225	225	181	193	237	245
	febWL03	139	139	226	226	-1	-1	-1	-1	-1	-1	-1	-1	225	225	-1	-1	241	241
	febWL04	-1	-1	-1	-1	-1	-1	211	211	146	146	166	169	225	225	193	193	237	245
	febWL05	147	147	224	226	254	254	205	211	137	143	163	166	225	229	181	189	237	241
	febWL06	139	147	226	230	254	268	208	211	146	146	166	169	225	225	189	193	237	245
	febWL07	139	139	226	230	254	260	202	208	137	146	166	166	-1	-1	181	189	241	245
	febWL08	147	147	-1	-1	254	266	208	208	-1	-1	166	166	-1	-1	189	193	245	245
	febWL09	139	139	226	234	254	260	208	211	-1	-1	166	169	225	229	189	193	237	245
	febWL10	139	141	226	234	254	254	208	211	146	146	166	169	-1	-1	189	193	241	245
	febWL11	139	141	230	234	254	254	205	211	143	146	166	166	-1	-1	-1	-1	245	245
	febWL12	139	147	234	238	254	254	208	211	143	146	166	169	-1	-1	-1	-1	-1	-1
	febWL13	139	147	236	236	-1	-1	208	214	143	146	163	169	217	225	189	193	241	249
	febWL14	139	139	-1	-1	-1	-1	205	205	146	146	-1	-1	-1	-1	-1	-1	-1	-1
	febWL15	139	147	226	230	254	260	208	208	137	143	166	166	225	225	181	189	237	241
	febWL16	139	147	230	234	254	262	205	208	143	146	163	169	213	225	181	189	237	245
	febWL17	139	139	226	230	254	264	208	211	143	146	166	169	225	225	189	193	237	245
2 steps-preserved fecal samples	fecWL01	139	147	214	222	254	254	202	205	143	146	169	169	-1	-1	-1	-1	-1	-1
	fecWL02	147	147	210	226	254	260	208	211	143	143	166	169	225	225	181	193	237	245
	fecWL03	139	139	226	226	-1	-1	-1	-1	-1	-1	-1	-1	-1	-1	-1	-1	-1	-1
	fecWL04	139	147	224	226	260	264	211	211	146	146	166	169	225	225	193	193	237	245
	fecWL05	147	147	224	226	254	254	205	211	137	143	163	166	225	229	181	189	237	241
	fecWL06	139	147	226	230	254	268	208	211	-1	-1	166	169	225	225	189	193	237	245
	fecWL07	139	139	226	230	254	260	202	208	137	146	166	166	225	229	181	189	241	245
	fecWL08	147	147	226	230	254	266	208	208	143	143	166	166	225	229	189	193	245	245
	fecWL09	139	139	226	234	254	260	208	211	146	146	166	169	225	229	189	193	237	245
	fecWL10	139	141	226	234	254	254	208	211	146	146	166	169	225	225	189	193	241	245
	fecWL11	139	141	230	234	254	254	205	211	143	146	166	166	225	225	185	193	237	245
	fecWL12	139	147	234	238	254	254	-1	-1	143	146	-1	-1	225	225	181	185	237	241
	fecWL13	139	147	224	236	262	270	208	214	143	146	163	169	217	225	189	193	241	249
	fecWL14	139	139	214	230	254	254	205	205	146	146	169	169	229	229	185	185	245	249
	fecWL15	139	147	226	230	254	260	208	208	146	143	166	166	225	225	181	189	237	241
	fecWL16	139	147	230	234	254	262	205	208	143	146	163	169	213	225	181	189	237	245
	fecWL17	139	139	226	230	254	264	-1	-1	143	146	166	169	225	225	189	193	237	245
DET-preseved fecal samples	fedWL01	139	147	-1	-1	254	254	-1	-1	143	143	-1	-1	-1	-1	-1	-1	-1	-1
	fedWL02	147	147	210	226	254	260	208	211	143	143	166	169	225	225	181	193	237	245
	fedWL03	139	139	226	226	-1	-1	-1	-1	-1	-1	-1	-1	225	225	-1	-1	-1	-1
	fedWL04	139	147	224	226	260	264	211	211	146	146	166	169	225	225	193	193	237	245
	fedWL05	147	147	224	226	254	254	205	211	137	143	163	166	-1	-1	-1	-1	-1	-1
	fedWL06	139	147	226	230	254	268	208	211	146	146	166	169	225	225	189	193	237	245
	fedWL07	139	139	226	230	254	260	202	208	137	146	166	166	225	229	181	189	241	245
	fedWL08	147	147	226	230	254	266	208	208	143	143	166	166	229	229	189	193	241	245
	fedWL09	139	139	226	234	254	260	208	211	146	146	166	169	225	229	189	193	237	245
	fedWL10	139	141	-1	-1	-1	-1	208	211	146	146	-1	-1	-1	-1	189	193	241	245
	fedWL11	139	141	230	234	254	254	205	211	143	146	166	166	225	225	185	193	-1	-1
	fedWL12	139	147	234	238	254	254	208	211	143	146	166	169	-1	-1	181	185	237	241
	fedWL13	139	147	224	236	262	270	208	214	143	146	163	169	-1	-1	189	193	-1	-1
	fedWL14	139	139	-1	-1	254	254	205	205	146	146	169	169	-1	-1	185	185	245	249
	fedWL15	139	147	226	230	254	260	208	208	137	143	166	166	-1	-1	181	189	-1	-1
	fedWL16	139	147	230	234	254	262	205	208	143	146	163	169	213	225	181	189	237	245
	fedWL17	139	139	226	230	254	264	208	205	143	146	-1	-1	225	225	189	193	237	245
-20℃-preserved fecal samples	feeWL01	139	147	-1	-1	-1	-1	-1	-1	146	146	-1	-1	-1	-1	-1	-1	-1	-1
	feeWL02	-1	-1	-1	-1	-1	-1	208	208	143	143	-1	-1	-1	-1	-1	-1	-1	-1
	feeWL03	139	139	226	226	-1	-1	-1	-1	-1	-1	-1	-1	-1	-1	-1	-1	241	241
	feeWL04	147	147	-1	-1	-1	-1	211	211	-1	-1	166	166	-1	-1	-1	-1	-1	-1
	feeWL05	139	139	-1	-1	-1	-1	211	211	-1	-1	-1	-1	225	229	181	189	237	241
	feeWL06	-1	-1	-1	-1	-1	-1	-1	-1	146	146	-1	-1	-1	-1	-1	-1	-1	-1
	feeWL07	139	139	226	230	254	260	202	208	137	146	166	166	225	229	181	189	241	245
	feeWL08	147	147	226	234	254	264	208	208	143	143	-1	-1	-1	-1	189	193	245	245
	feeWL09	139	139	-1	-1	-1	-1	208	211	-1	-1	-1	-1	-1	-1	189	193	-1	-1
	feeWL10	139	141	-1	-1	-1	-1	208	211	146	146	-1	-1	-1	-1	-1	-1	245	245
	feeWL11	139	141	-1	-1	-1	-1	-1	-1	-1	-1	-1	-1	-1	-1	-1	-1	-1	-1
	feeWL12	139	139	-1	-1	-1	-1	208	208	143	146	-1	-1	-1	-1	-1	-1	-1	-1
	feeWL13	139	139	-1	-1	-1	-1	211	211	143	146	-1	-1	-1	-1	-1	-1	-1	-1
	feeWL14	139	139	-1	-1	-1	-1	205	205	-1	-1	-1	-1	-1	-1	-1	-1	-1	-1
	feeWL15	139	147	226	230	254	260	208	208	143	143	-1	-1	225	225	181	189	237	241
	feeWL16	139	139	-1	-1	-1	-1	208	208	-1	-1	-1	-1	-1	-1	-1	-1	-1	-1
	feeWL17	139	139	-1	-1	-1	-1	-1	-1	143	146	-1	-1	-1	-1	-1	-1	-1	-1

## Sheet: 6 months
Genotype of giant panda
		Gp4		Aime10		Aime16		Panda22		Panda25		Panda29		Gpz6		Gpl29		Gpl60
EtoH-Preserved fecal samples	feaWL01	139	147	214	222	254	254	202	205	143	146	169	169	225	225	181	193	237	245
	feaWL02	139	147	210	226	254	254	-1	-1	143	143	166	169	225	225	181	193	237	245
	feaWL03	139	139	226	226	-1	-1	205	205	146	146	-1	-1	225	225	-1	-1	237	245
	feaWL04	139	147	226	226	-1	-1	211	211	146	146	166	169	225	225	193	193	237	245
	feaWL05	147	147	226	226	254	254	205	211	137	143	163	166	-1	-1	181	189	-1	-1
	feaWL06	139	147	226	230	254	268	208	211	146	146	166	169	225	225	189	193	237	245
	feaWL07	139	139	226	230	254	260	202	208	137	146	166	166	225	229	181	189	241	245
	feaWL08	147	147	226	230	254	254	208	208	143	143	166	166	225	229	189	193	245	245
	feaWL09	139	139	226	234	254	254	208	211	146	146	166	169	-1	-1	-1	-1	237	245
	feaWL10	139	141	226	234	254	254	208	211	146	146	166	169	-1	-1	189	193	241	245
	feaWL11	139	141	230	234	254	254	205	211	143	146	166	166	225	225	185	193	237	245
	feaWL12	139	147	234	238	254	254	208	211	143	146	166	169	225	225	181	185	237	241
	feaWL13	141	147	222	238	260	270	208	214	143	146	163	169	217	225	189	193	241	249
	feaWL14	141	141	230	230	254	254	205	205	146	146	169	169	-1	-1	185	185	245	249
	feaWL15	139	147	226	230	254	260	208	208	137	143	166	166	225	225	181	189	237	241
	feaWL16	139	147	230	234	254	262	205	208	143	146	163	169	213	225	181	189	237	245
	feaWL17	-1	-1	230	230	254	266	208	211	143	146	166	169	225	225	-1	-1	-1	-1
EtoH/-20℃	febWL01	139	147	214	222	254	254	202	205	143	146	169	169	-1	-1	-1	-1	-1	-1
	febWL02	139	147	-1	-1	254	254	208	211	143	143	166	169	-1	-1	-1	-1	237	245
	febWL03	-1	-1	-1	-1	-1	-1	205	205	143	143	166	166	225	225	-1	-1	237	245
	febWL04	139	139	-1	-1	-1	-1	211	211	146	146	166	169	-1	-1	193	193	237	245
	febWL05	147	147	226	226	254	254	205	211	137	143	-1	-1	225	229	181	189	237	241
	febWL06	139	147	-1	-1	-1	-1	208	211	146	146	166	169	225	225	189	193	237	245
	febWL07	139	139	226	230	254	260	202	208	137	146	166	166	225	229	181	189	241	245
	febWL08	147	147	226	230	-1	-1	208	208	143	143	166	166	225	229	189	193	245	245
	febWL09	139	139	-1	-1	254	260	208	211	146	146	166	169	-1	-1	189	193	237	245
	febWL10	139	141	226	234	254	254	-1	-1	146	146	166	169	-1	-1	189	193	241	245
	febWL11	139	141	230	234	254	254	-1	-1	-1	-1	166	166	225	225	185	193	237	245
	febWL12	-1	-1	-1	-1	-1	-1	-1	-1	143	146	166	169	225	225	181	185	237	241
	febWL13	141	147	-1	-1	260	270	208	214	143	146	163	169	217	225	189	193	241	249
	febWL14	141	147	-1	-1	254	254	-1	-1	-1	-1	169	169	-1	-1	-1	-1	-1	-1
	febWL15	139	147	226	230	254	260	208	208	137	143	166	166	225	225	181	189	237	241
	febWL16	139	147	234	234	-1	-1	205	208	143	146	163	169	213	225	181	189	237	245
	febWL17	139	139	226	230	-1	-1	208	211	143	146	166	169	225	225	189	193	237	245
2 steps-preserved fecal samples	fecWL01	139	147	-1	-1	254	254	202	205	143	143	169	169	225	225	-1	-1	237	245
	fecWL02	147	147	210	226	254	254	208	211	143	143	166	169	225	225	181	193	237	245
	fecWL03	139	139	226	226	-1	-1	205	205	143	143	-1	-1	225	225	-1	-1	237	245
	fecWL04	139	147	226	226	-1	-1	211	211	146	146	166	169	-1	-1	193	193	237	245
	fecWL05	147	147	226	226	254	254	205	211	137	143	163	166	225	229	181	189	237	241
	fecWL06	139	147	226	230	254	254	208	211	146	146	166	169	225	225	189	193	237	245
	fecWL07	139	139	226	230	254	260	202	208	137	146	166	166	225	229	181	189	241	245
	fecWL08	139	139	226	230	-1	-1	208	208	143	143	166	166	225	229	189	193	245	245
	fecWL09	139	139	226	226	254	260	208	211	146	146	166	169	-1	-1	189	193	237	245
	fecWL10	139	141	226	234	254	254	208	211	146	146	166	169	-1	-1	189	193	-1	-1
	fecWL11	139	141	-1	-1	254	254	-1	-1	-1	-1	166	166	225	225	185	193	237	245
	fecWL12	139	139	230	238	-1	-1	-1	-1	-1	-1	169	169	225	225	-1	-1	237	241
	fecWL13	141	141	226	226	-1	-1	208	208	143	146	-1	-1	-1	-1	-1	-1	-1	-1
	fecWL14	141	141	214	230	254	254	205	205	146	146	169	169	229	229	185	185	245	249
	fecWL15	139	147	226	230	254	260	208	208	137	143	166	166	225	225	181	189	237	241
	fecWL16	139	147	230	234	254	262	-1	-1	-1	-1	163	169	213	225	181	189	237	245
	fecWL17	139	139	226	230	254	254	208	211	143	146	166	169	225	225	189	193	237	245
DET-preseved fecal samples	fedWL01	-1	-1	-1	-1	-1	-1	-1	-1	-1	-1	-1	-1	-1	-1	-1	-1	237	245
	fedWL02	139	147	-1	-1	254	254	208	211	143	143	166	169	-1	-1	-1	-1	-1	-1
	fedWL03	139	139	-1	-1	-1	-1	-1	-1	143	143	166	166	-1	-1	-1	-1	-1	-1
	fedWL04	139	147	226	226	-1	-1	211	211	146	146	166	169	-1	-1	193	193	237	245
	fedWL05	147	147	226	226	254	254	205	211	137	143	163	166	-1	-1	-1	-1	237	241
	fedWL06	139	147	226	230	254	254	208	211	146	146	166	169	-1	-1	-1	-1	237	245
	fedWL07	139	139	-1	-1	-1	-1	202	208	137	146	166	166	-1	-1	181	189	-1	-1
	fedWL08	147	147	226	230	254	266	208	208	143	143	166	166	225	229	189	193	245	245
	fedWL09	139	139	226	226	254	260	208	211	146	146	166	169	-1	-1	189	193	237	245
	fedWL10	139	141	-1	-1	-1	-1	208	211	146	146	166	169	-1	-1	189	193	241	245
	fedWL11	139	141	230	234	254	254	205	211	143	146	166	166	225	225	185	193	237	245
	fedWL12	139	147	-1	-1	254	254	208	211	143	146	166	169	225	225	181	185	237	241
	fedWL13	141	147	-1	-1	260	260	208	208	143	146	163	169	-1	-1	189	193	241	249
	fedWL14	141	141	-1	-1	254	254	205	205	146	146	169	169	229	229	185	185	245	249
	fedWL15	139	147	226	230	254	260	208	208	137	143	-1	-1	-1	-1	181	189	237	241
	fedWL16	139	147	230	234	254	262	205	208	143	146	163	169	213	225	181	189	237	245
	fedWL17	139	139	226	230	-1	-1	208	211	143	146	166	169	225	225	189	193	237	245
-20℃-preserved fecal samples	feeWL01	139	147	-1	-1	254	254	202	205	143	143	-1	-1	-1	-1	-1	-1	237	245
	feeWL02	139	139	-1	-1	254	254	-1	-1	143	143	-1	-1	-1	-1	-1	-1	237	245
	feeWL03	139	139	-1	-1	-1	-1	205	205	143	143	-1	-1	-1	-1	-1	-1	241	245
	feeWL04	139	139	-1	-1	-1	-1	-1	-1	146	146	-1	-1	-1	-1	-1	-1	237	245
	feeWL05	139	139	-1	-1	-1	-1	205	211	137	143	163	166	-1	-1	-1	-1	237	241
	feeWL06	139	147	-1	-1	254	254	-1	-1	-1	-1	166	166	-1	-1	-1	-1	237	245
	feeWL07	139	139	226	230	254	254	202	208	137	146	-1	-1	-1	-1	181	189	241	245
	feeWL08	139	139	-1	-1	254	254	-1	-1	143	143	-1	-1	-1	-1	-1	-1	245	245
	feeWL09	139	139	-1	-1	254	254	208	211	146	146	-1	-1	-1	-1	-1	-1	237	245
	feeWL10	139	141	-1	-1	254	254	208	211	146	146	169	169	-1	-1	-1	-1	-1	-1
	feeWL11	139	139	230	234	-1	-1	-1	-1	143	146	-1	-1	-1	-1	-1	-1	237	245
	feeWL12	-1	-1	-1	-1	254	254	208	208	146	146	-1	-1	225	225	-1	-1	237	241
	feeWL13	141	141	226	226	254	254	-1	-1	143	146	-1	-1	225	225	-1	-1	-1	-1
	feeWL14	-1	-1	-1	-1	-1	-1	-1	-1	146	146	-1	-1	-1	-1	-1	-1	-1	-1
	feeWL15	139	147	-1	-1	-1	-1	-1	-1	-1	-1	-1	-1	-1	-1	-1	-1	237	241
	feeWL16	139	147	230	230	254	254	-1	-1	-1	-1	-1	-1	-1	-1	-1	-1	237	245
	feeWL17	139	139	226	230	-1	-1	-1	-1	-1	-1	-1	-1	225	225	-1	-1	237	245
